# Supplementary material
Source: Royal Society of Chemistry journal article supplement (doi:10.1039/d6cp01304j)
Supplement: d6cp01304j1.zip [file esi-lm26.pdf › esi-lm26.pdf]

# Supplementary Information for: The effects of dispersion damping and three-body interactions for accurate layered material exfoliation energies

Adrian F. Rumson

*Department of Chemistry, Dalhousie University, 6274 Coburg Rd, Halifax, Nova Scotia, B3H 4R2, Canada*

Kyle R. Bryenton

*Department of Chemistry, Dalhousie University, 6274 Coburg Rd, Halifax, Nova Scotia, B3H 4R2, Canada and  
Department of Physics & Atmospheric Science, Dalhousie University,  
6274 Coburg Rd, Halifax, Nova Scotia, B3H 4R2, Canada*

Erin R. Johnson\*

*Department of Chemistry, Dalhousie University, 6274 Coburg Rd, Halifax, Nova Scotia, B3H 4R2, Canada  
Department of Physics & Atmospheric Science, Dalhousie University,  
6274 Coburg Rd, Halifax, Nova Scotia, B3H 4R2, Canada and  
Yusuf Hamied Department of Chemistry, University of Cambridge, Lensfield Road, Cambridge, CB2 1EW, UK.  
(Dated: May 9, 2026)*

---

\* erin.johnson@dal.ca

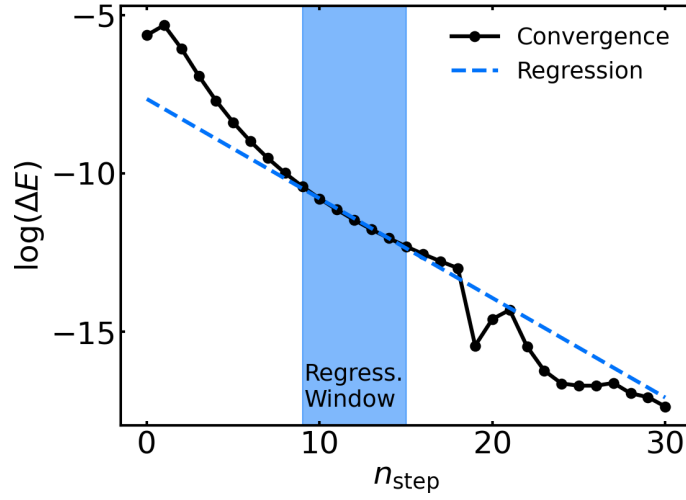

FIG. 1: Visual comparison of direct convergence of the ATM energy *versus* the extrapolation method for a test case: HCP-zirconium.

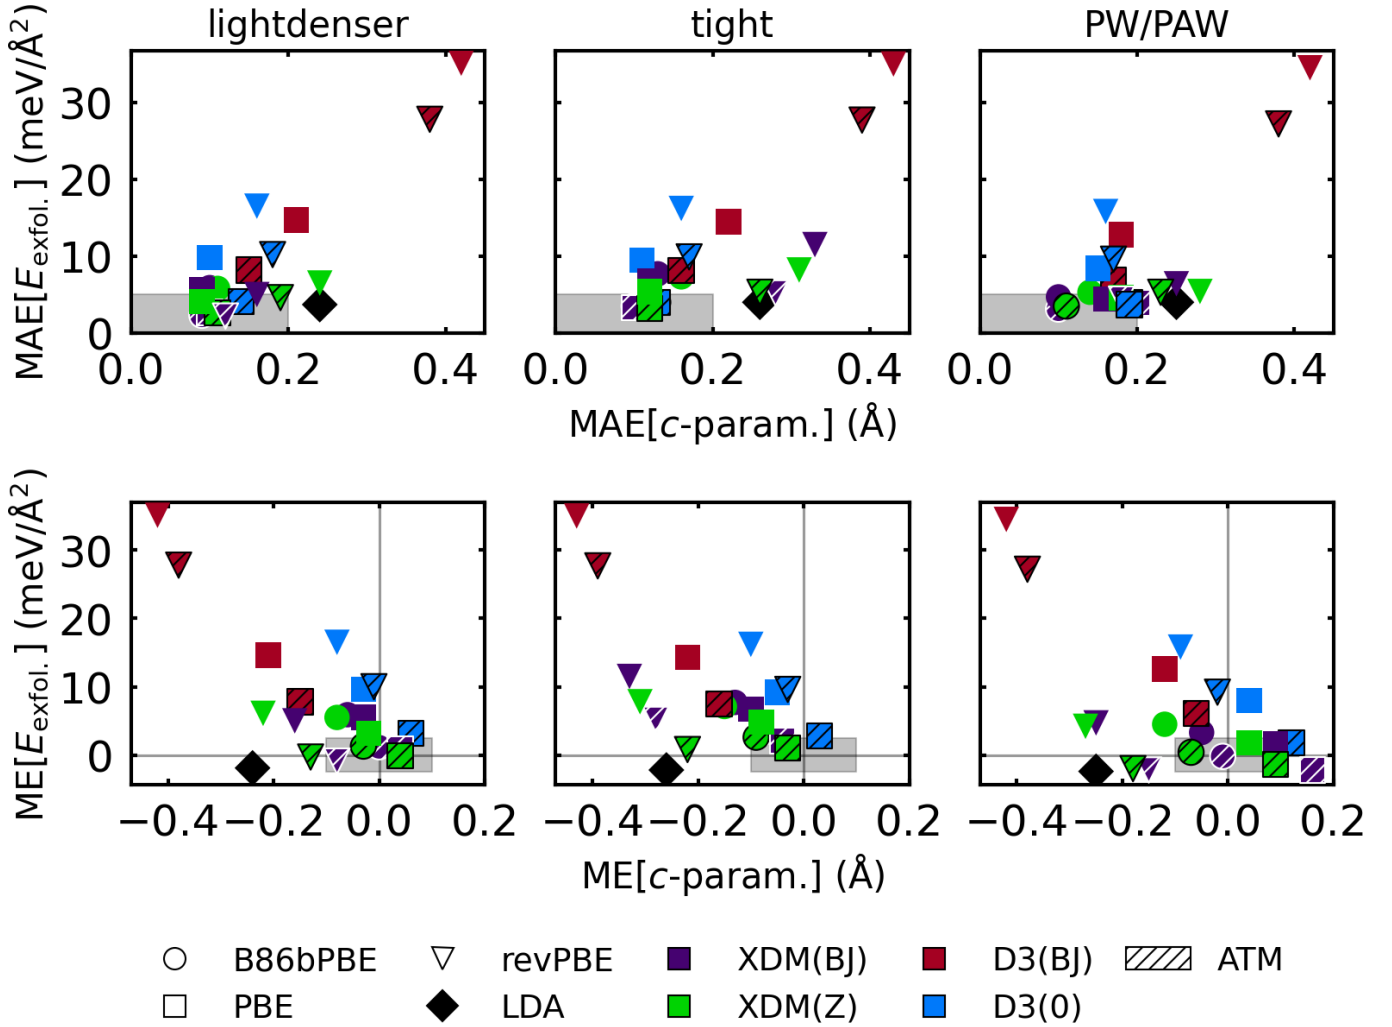

FIG. 2: Plot of the mean absolute errors (MAE) and mean errors (ME) of the exfoliation energies and  $c$ -parameters of the LM26 benchmark. A grey box, designating acceptable accuracy of  $5 \text{ meV}/\text{\AA}^2$  for  $E_{\text{exfol.}}$  and  $0.2 \text{ \AA}$  for  $c$ -parameters, is also shown.

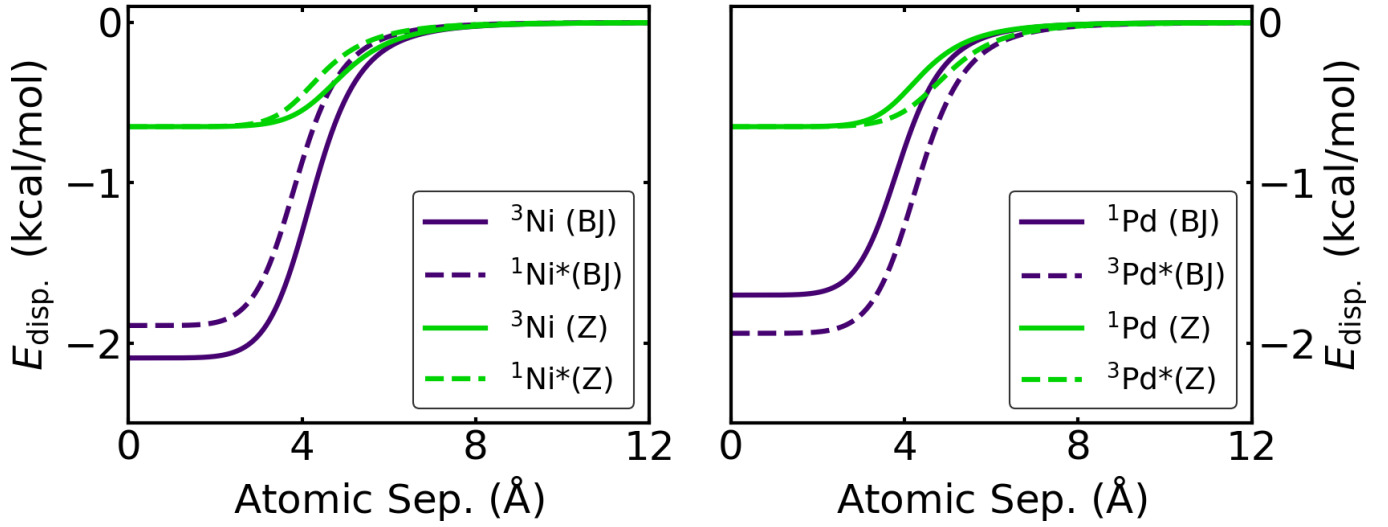

FIG. 3: Comparison of the BJ- and Z-damping functions for singlet and triplet nickel and palladium. All calculations used the same methodology as described in Figure 2 of the main text.

TABLE I: Reference data used for the LM26 benchmark.

| LM                | $c_{\text{ref.}}$<br>(Å) | $ab\text{-area}$<br>(Å <sup>2</sup> ) | $n_{\text{layers}}$ | $E_{\text{ref.}}^{\text{RPA}}$<br>(meV/Å <sup>2</sup> ) | $E_{\text{ref.}}^{\text{RPA}}$<br>(kcal/mol/layer) |
|-------------------|--------------------------|---------------------------------------|---------------------|---------------------------------------------------------|----------------------------------------------------|
| BN                | 6.7                      | 5.5                                   | 2                   | 21.6                                                    | 2.7                                                |
| graphite          | 6.9                      | 5.3                                   | 2                   | 19.7                                                    | 2.4                                                |
| HfS <sub>2</sub>  | 5.8                      | 11.4                                  | 1                   | 16.1                                                    | 4.2                                                |
| HfSe <sub>2</sub> | 6.2                      | 12.2                                  | 1                   | 17.1                                                    | 4.8                                                |
| HfTe <sub>2</sub> | 6.7                      | 13.6                                  | 1                   | 18.7                                                    | 5.8                                                |
| MoS <sub>2</sub>  | 12.3                     | 8.7                                   | 2                   | 20.5                                                    | 4.1                                                |
| MoSe <sub>2</sub> | 12.9                     | 9.4                                   | 2                   | 19.6                                                    | 4.2                                                |
| MoTe <sub>2</sub> | 14.0                     | 10.7                                  | 2                   | 20.8                                                    | 5.1                                                |
| NbSe <sub>2</sub> | 12.5                     | 10.3                                  | 2                   | 19.6                                                    | 4.6                                                |
| NbTe <sub>2</sub> | 6.6                      | 11.7                                  | 1                   | 23.0                                                    | 6.2                                                |
| PbO               | 5.0                      | 15.8                                  | 1                   | 20.2                                                    | 7.3                                                |
| PdTe <sub>2</sub> | 5.1                      | 14.1                                  | 1                   | 40.2                                                    | 13.0                                               |
| PtS <sub>2</sub>  | 5.0                      | 10.9                                  | 1                   | 20.6                                                    | 5.2                                                |
| PtSe <sub>2</sub> | 5.1                      | 12.0                                  | 1                   | 19.1                                                    | 5.3                                                |
| TaS <sub>2</sub>  | 5.9                      | 9.8                                   | 1                   | 17.7                                                    | 4.0                                                |
| TaSe <sub>2</sub> | 6.2                      | 10.7                                  | 1                   | 19.4                                                    | 4.8                                                |
| TiS <sub>2</sub>  | 5.7                      | 10.0                                  | 1                   | 18.9                                                    | 4.3                                                |
| TiSe <sub>2</sub> | 6.0                      | 10.9                                  | 1                   | 17.4                                                    | 4.3                                                |
| TiTe <sub>2</sub> | 6.5                      | 12.2                                  | 1                   | 19.8                                                    | 5.6                                                |
| VS <sub>2</sub>   | 5.8                      | 9.0                                   | 1                   | 25.6                                                    | 5.3                                                |
| VSe <sub>2</sub>  | 6.0                      | 9.7                                   | 1                   | 22.3                                                    | 5.0                                                |
| WS <sub>2</sub>   | 12.3                     | 8.7                                   | 2                   | 20.2                                                    | 4.0                                                |
| WSe <sub>2</sub>  | 13.0                     | 9.3                                   | 2                   | 20.0                                                    | 4.3                                                |
| ZrS <sub>2</sub>  | 5.8                      | 11.6                                  | 1                   | 17.0                                                    | 4.5                                                |
| ZrSe <sub>2</sub> | 6.1                      | 12.3                                  | 1                   | 18.5                                                    | 5.2                                                |
| ZrTe <sub>2</sub> | 6.7                      | 13.5                                  | 1                   | 16.3                                                    | 5.1                                                |

TABLE II: Mean absolute errors (MAE) and mean errors (ME) in kcal/mol per layer for the LM26 benchmark of exfoliation energies of 26 layered materials, including graphite, boron nitride, lead(II) oxide, and transition-metal dichalcogenides.

| Functional          | lightdenser |      | tight |      | PW  |      |
|---------------------|-------------|------|-------|------|-----|------|
|                     | MAE         | ME   | MAE   | ME   | MAE | ME   |
| revPBE-D3(BJ)       | 8.8         | 8.8  | 8.8   | 8.8  | 8.6 | 8.6  |
| revPBE-D3(BJ)+ATM   | 7.0         | 7.0  | 7.0   | 7.0  | 6.9 | 6.9  |
| revPBE-D3(0)        | 4.1         | 4.1  | 4.1   | 4.1  | 4.0 | 4.0  |
| revPBE-D3(0)+ATM    | 2.6         | 2.5  | 2.5   | 2.5  | 2.4 | 2.4  |
| PBE-D3(BJ)          | 3.7         | 3.7  | 3.7   | 3.7  | 3.3 | 3.2  |
| PBE-D3(BJ)+ATM      | 2.1         | 2.0  | 2.1   | 2.0  | 1.8 | 1.6  |
| PBE-D3(0)           | 2.5         | 2.4  | 2.4   | 2.4  | 2.1 | 2.1  |
| PBE-D3(0)+ATM       | 1.0         | 0.9  | 1.0   | 0.8  | 0.9 | 0.5  |
| revPBE-XDM(BJ)      | 1.3         | 1.3  | 2.9   | 2.9  | 1.6 | 1.2  |
| revPBE-XDM(Z)       | 1.8         | 1.7  | 2.3   | 2.2  | 1.5 | 1.2  |
| revPBE-XDM(BJ)+ATM  | 0.5         | -0.2 | 1.4   | 1.4  | 1.1 | -0.5 |
| revPBE-XDM(Z)+ATM   | 1.2         | 0.1  | 1.4   | 0.4  | 1.3 | -0.4 |
| B86bPBE-XDM(BJ)     | 1.5         | 1.5  | 2.0   | 2.0  | 1.2 | 0.8  |
| B86bPBE-XDM(Z)      | 1.6         | 1.5  | 2.0   | 1.9  | 1.4 | 1.2  |
| B86bPBE-XDM(BJ)+ATM | 0.6         | 0.4  | 0.9   | 0.9  | 0.8 | -0.0 |
| B86bPBE-XDM(Z)+ATM  | 0.8         | 0.5  | 1.1   | 0.8  | 0.9 | 0.2  |
| PBE-XDM(BJ)         | 1.5         | 1.5  | 1.8   | 1.8  | 1.2 | 0.5  |
| PBE-XDM(Z)          | 1.1         | 0.9  | 1.4   | 1.3  | 1.2 | 0.6  |
| PBE-XDM(BJ)+ATM     | 0.7         | 0.3  | 0.9   | 0.6  | 1.0 | -0.5 |
| PBE-XDM(Z)+ATM      | 0.6         | 0.1  | 0.8   | 0.4  | 0.9 | -0.2 |
| revPBE              | 4.9         | -4.9 | 5.0   | -5.0 | 5.0 | -5.0 |
| B86bPBE             | 4.6         | -4.6 | 4.7   | -4.7 | 4.8 | -4.8 |
| PBE                 | 4.3         | -4.3 | 4.5   | -4.5 | 4.6 | -4.6 |
| PBEsol              | 2.8         | -2.8 | 2.8   | -2.8 | 3.0 | -3.0 |
| LDA                 | 0.8         | -0.3 | 0.9   | -0.4 | 0.9 | -0.4 |

TABLE III: Mean absolute errors (MAE) and mean errors (ME) in Ångströms for the LM26 benchmark of  $c$ -parameters of 26 layered materials, including graphite, boron nitride, lead(II) oxide, and transition-metal dichalcogenides.

| Functional          | lightdenser |       | tight |       | PW   |       |
|---------------------|-------------|-------|-------|-------|------|-------|
|                     | MAE         | ME    | MAE   | ME    | MAE  | ME    |
| revPBE-D3(BJ)       | 0.42        | -0.42 | 0.43  | -0.43 | 0.42 | -0.42 |
| revPBE-D3(BJ)+ATM   | 0.38        | -0.38 | 0.39  | -0.39 | 0.38 | -0.38 |
| revPBE-D3(0)        | 0.16        | -0.08 | 0.16  | -0.10 | 0.16 | -0.09 |
| revPBE-D3(0)+ATM    | 0.18        | -0.01 | 0.17  | -0.03 | 0.17 | -0.02 |
| PBE-D3(BJ)          | 0.21        | -0.21 | 0.22  | -0.22 | 0.18 | -0.12 |
| PBE-D3(BJ)+ATM      | 0.15        | -0.15 | 0.16  | -0.16 | 0.17 | -0.06 |
| PBE-D3(0)           | 0.10        | -0.03 | 0.11  | -0.05 | 0.15 | 0.04  |
| PBE-D3(0)+ATM       | 0.14        | 0.06  | 0.13  | 0.03  | 0.19 | 0.12  |
| revPBE-XDM(BJ)      | 0.16        | -0.16 | 0.33  | -0.33 | 0.25 | -0.25 |
| revPBE-XDM(Z)       | 0.24        | -0.22 | 0.31  | -0.31 | 0.28 | -0.27 |
| revPBE-XDM(BJ)+ATM  | 0.12        | -0.08 | 0.28  | -0.28 | 0.18 | -0.15 |
| revPBE-XDM(Z)+ATM   | 0.19        | -0.13 | 0.26  | -0.22 | 0.23 | -0.18 |
| B86bPBE-XDM(BJ)     | 0.10        | -0.06 | 0.13  | -0.13 | 0.10 | -0.05 |
| B86bPBE-XDM(Z)      | 0.11        | -0.08 | 0.16  | -0.15 | 0.14 | -0.12 |
| B86bPBE-XDM(BJ)+ATM | 0.09        | 0.00  | 0.10  | -0.08 | 0.10 | -0.01 |
| B86bPBE-XDM(Z)+ATM  | 0.10        | -0.03 | 0.13  | -0.09 | 0.11 | -0.07 |
| PBE-XDM(BJ)         | 0.09        | -0.03 | 0.12  | -0.10 | 0.16 | 0.09  |
| PBE-XDM(Z)          | 0.09        | -0.02 | 0.12  | -0.08 | 0.18 | 0.04  |
| PBE-XDM(BJ)+ATM     | 0.10        | 0.04  | 0.10  | -0.04 | 0.20 | 0.16  |
| PBE-XDM(Z)+ATM      | 0.11        | 0.04  | 0.12  | -0.03 | 0.19 | 0.09  |
| revPBE              | 2.90        | 2.90  | 3.50  | 3.50  | 3.82 | 3.82  |
| B86bPBE             | 1.25        | 1.25  | 1.38  | 1.38  | 1.68 | 1.68  |
| PBE                 | 1.02        | 1.02  | 1.02  | 1.02  | 1.17 | 1.17  |
| PBEsol              | 0.13        | 0.01  | 0.15  | 0.00  | 0.16 | 0.00  |
| LDA                 | 0.24        | -0.24 | 0.26  | -0.26 | 0.25 | -0.25 |

TABLE IV: Minimum (MIN), maximum (MAX), and mean (AVG) values of the ATM term with various damping schemes in meV/Å<sup>2</sup> for the LM26 benchmark.

| Method  |         | lightdenser |      |     | tight |      |     | PW   |      |     |
|---------|---------|-------------|------|-----|-------|------|-----|------|------|-----|
|         |         | MIN         | MAX  | AVG | MIN   | MAX  | AVG | MIN  | MAX  | AVG |
| revPBE  | ATM(0)  | 2.5         | 11.6 | 6.6 | 2.4   | 11.6 | 6.6 | 2.4  | 11.5 | 6.6 |
|         | ATM(BJ) | 2.6         | 7.9  | 5.9 | 3.0   | 8.3  | 6.3 | 1.7  | 10.0 | 6.9 |
|         | ATM(Z)  | 2.8         | 8.6  | 6.4 | 3.1   | 9.5  | 7.0 | -0.5 | 6.3  | 6.3 |
| B86bPBE | ATM(BJ) | 1.8         | 6.2  | 4.7 | 1.9   | 6.0  | 4.5 | 0.1  | 5.3  | 3.5 |
|         | ATM(Z)  | 1.5         | 5.5  | 4.2 | 1.6   | 6.2  | 4.6 | 1.6  | 5.2  | 4.1 |
| PBE     | ATM(0)  | 2.7         | 10.4 | 6.4 | 2.7   | 10.3 | 6.4 | 2.8  | 9.2  | 6.3 |
|         | ATM(BJ) | 1.5         | 6.3  | 4.6 | 1.5   | 6.3  | 4.6 | -0.3 | 5.6  | 3.9 |
|         | ATM(Z)  | 1.1         | 4.5  | 3.4 | 1.2   | 5.1  | 3.7 | 1.2  | 4.4  | 3.2 |

TABLE V: Minimum (MIN), maximum (MAX), and mean (AVG) values of the ATM term with various damping schemes in kcal/mol per layer for the LM26 benchmark.

| Method  |         | lightdenser |     |     | tight |     |     | PW   |     |     |
|---------|---------|-------------|-----|-----|-------|-----|-----|------|-----|-----|
|         |         | MIN         | MAX | AVG | MIN   | MAX | AVG | MIN  | MAX | AVG |
| revPBE  | ATM(0)  | 0.5         | 2.9 | 1.6 | 0.5   | 2.9 | 1.6 | 0.5  | 2.9 | 1.6 |
|         | ATM(BJ) | 0.3         | 2.1 | 1.5 | 0.4   | 2.2 | 1.6 | 0.4  | 2.3 | 1.7 |
|         | ATM(Z)  | 0.4         | 2.3 | 1.6 | 0.4   | 2.6 | 1.8 | -0.1 | 4.4 | 1.7 |
| B86bPBE | ATM(BJ) | 0.2         | 1.7 | 1.2 | 0.2   | 1.6 | 1.1 | 0.0  | 1.1 | 0.8 |
|         | ATM(Z)  | 0.2         | 1.5 | 1.0 | 0.2   | 1.7 | 1.1 | 0.2  | 1.4 | 1.0 |
| PBE     | ATM(0)  | 0.4         | 2.6 | 1.6 | 0.4   | 2.6 | 1.6 | 0.4  | 2.7 | 1.5 |
|         | ATM(BJ) | 0.2         | 1.7 | 1.1 | 0.2   | 1.7 | 1.1 | -0.1 | 1.4 | 0.9 |
|         | ATM(Z)  | 0.1         | 1.2 | 0.8 | 0.1   | 1.4 | 0.9 | 0.1  | 1.2 | 0.8 |
